# Supplementary material for: Chemical screening by time-resolved X-ray scattering to discover allosteric probes
Source: PubMed Central journal article supplement (PMC11358040; doi:10.1038/s41589-024-01609-1), 2024-04-26
Supplement: 41589_2024_1609_MOESM1_ESM.pdf [file 41589_2024_1609_MOESM1_ESM.pdf]

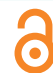

---

# Chemical screening by time-resolved X-ray scattering to discover allosteric probes

---

In the format provided by the authors and unedited

## **Table of Contents**

### ***Supplementary Figures***

|                                                                                                                |    |
|----------------------------------------------------------------------------------------------------------------|----|
| Supplementary Figure 1. GL2500 time-resolved $V_R$ SAXS similarity matrix (SSM) maps .....                     | 3  |
| Supplementary Figure 2. TR-SAXS characterization of the CX1 chemotype .....                                    | 4  |
| Supplementary Figure 3. TR-SAXS characterization of the CX2 chemotype (C9-D7).....                             | 5  |
| Supplementary Figure 4. TR-SAXS characterization of the CX2 chemotype (D8-E3).....                             | 6  |
| Supplementary Figure 5. TR-SAXS characterization of the CX3 and CX4 chemotypes.....                            | 7  |
| Supplementary Figure 6. TR-SAXS characterization of the CX4 chemotype (B8-C4) .....                            | 8  |
| Supplementary Figure 7. SAXS $k_{VR}$ exponential fits for CX1 and CX2 chemotypes .....                        | 9  |
| Supplementary Figure 8. Counter SAR from 4-aminoquinolines excluded from GL2500 HT-DSF<br>screening hits ..... | 10 |
| Supplementary Figure 9. TR-SAXS characterization of AIF-W196A with CX1 chemotype ligands .....                 | 11 |
| Supplementary Figure 10. AIF-WT and AIF-W196A active site SA-omit maps.....                                    | 12 |
| Supplementary Figure 11. Uncropped SDS-PAGE gels of wild-type and mutant AIF cross-linking<br>reactions .....  | 13 |
| Supplementary Figure 12. SDS-PAGE analysis of AIF-WT, AIF-W196A, and CHCHD4 SEC profiles .....                 | 14 |
| Supplementary Figure 13. Chemical 2D Diagrams of GL2500 Fragment Hits and 4-aminoquinoline<br>scaffold .....   | 15 |
| Supplementary Figure 14. Uncropped gel images from Supplementary Fig. 12.....                                  | 16 |

### ***Supplementary Tables***

|                                                                                                                                                        |    |
|--------------------------------------------------------------------------------------------------------------------------------------------------------|----|
| Supplementary Table 1. Small molecule screening data .....                                                                                             | 17 |
| Supplementary Table 2. AIF HT-DSF GL2500 fragment hits. ....                                                                                           | 19 |
| Supplementary Table 3. SAXS collection and analysis parameters .....                                                                                   | 20 |
| Supplementary Table 4. Wild-type and W196A AIF affinities for mitochondrial partner CHCHD4<br>stimulated by native NADH or CX1 chemotype ligands ..... | 22 |
| Supplementary Table 5. AIF-GL2500 summary of crystallographic structures .....                                                                         | 22 |
| Supplementary Table 6. X-ray data collection and refinement statistics for AIF-W196A-GL2500<br>complexes .....                                         | 23 |
| Supplementary Table 7. X-ray collection and refinement statistics for AIF-WT-GL2500 complexes .....                                                    | 24 |

|                                              |    |
|----------------------------------------------|----|
| <b><i>Supplementary References</i></b> ..... | 25 |
|----------------------------------------------|----|

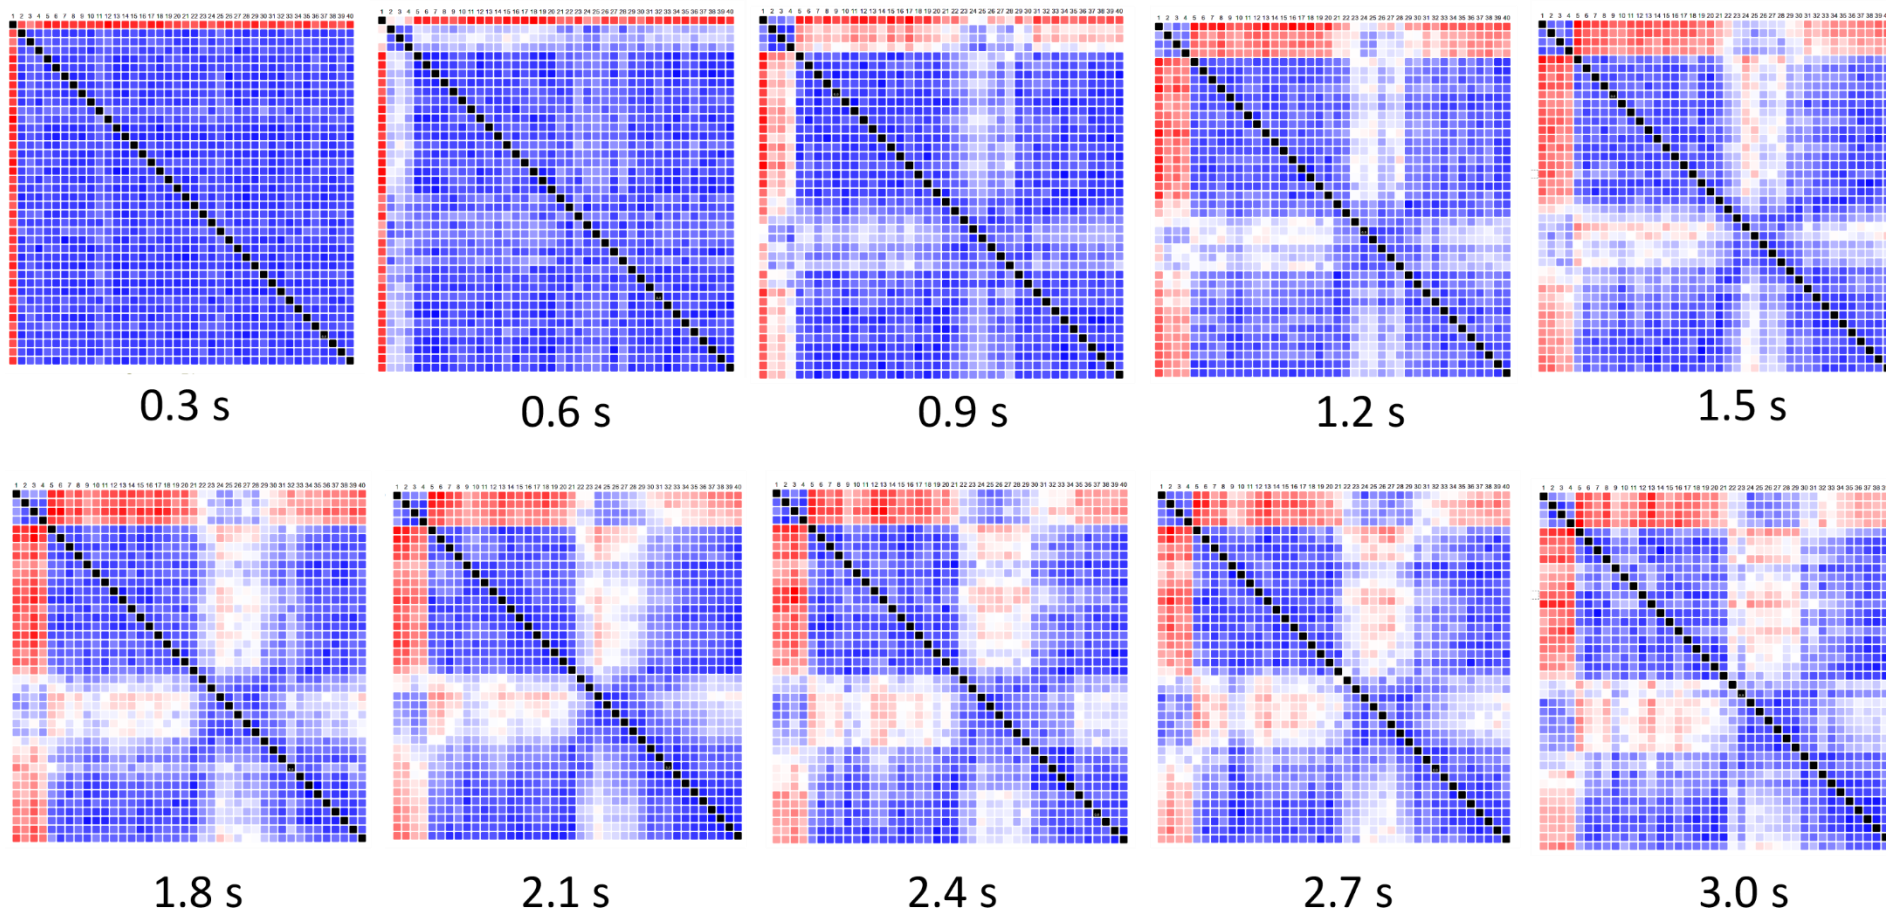

**Supplementary Figure 1. GL2500 time-resolved  $V_R$  SAXS similarity matrix (SSM) maps.** Samples within matrices are sorted using the clustered ranking from the SSM at 2.1 s.

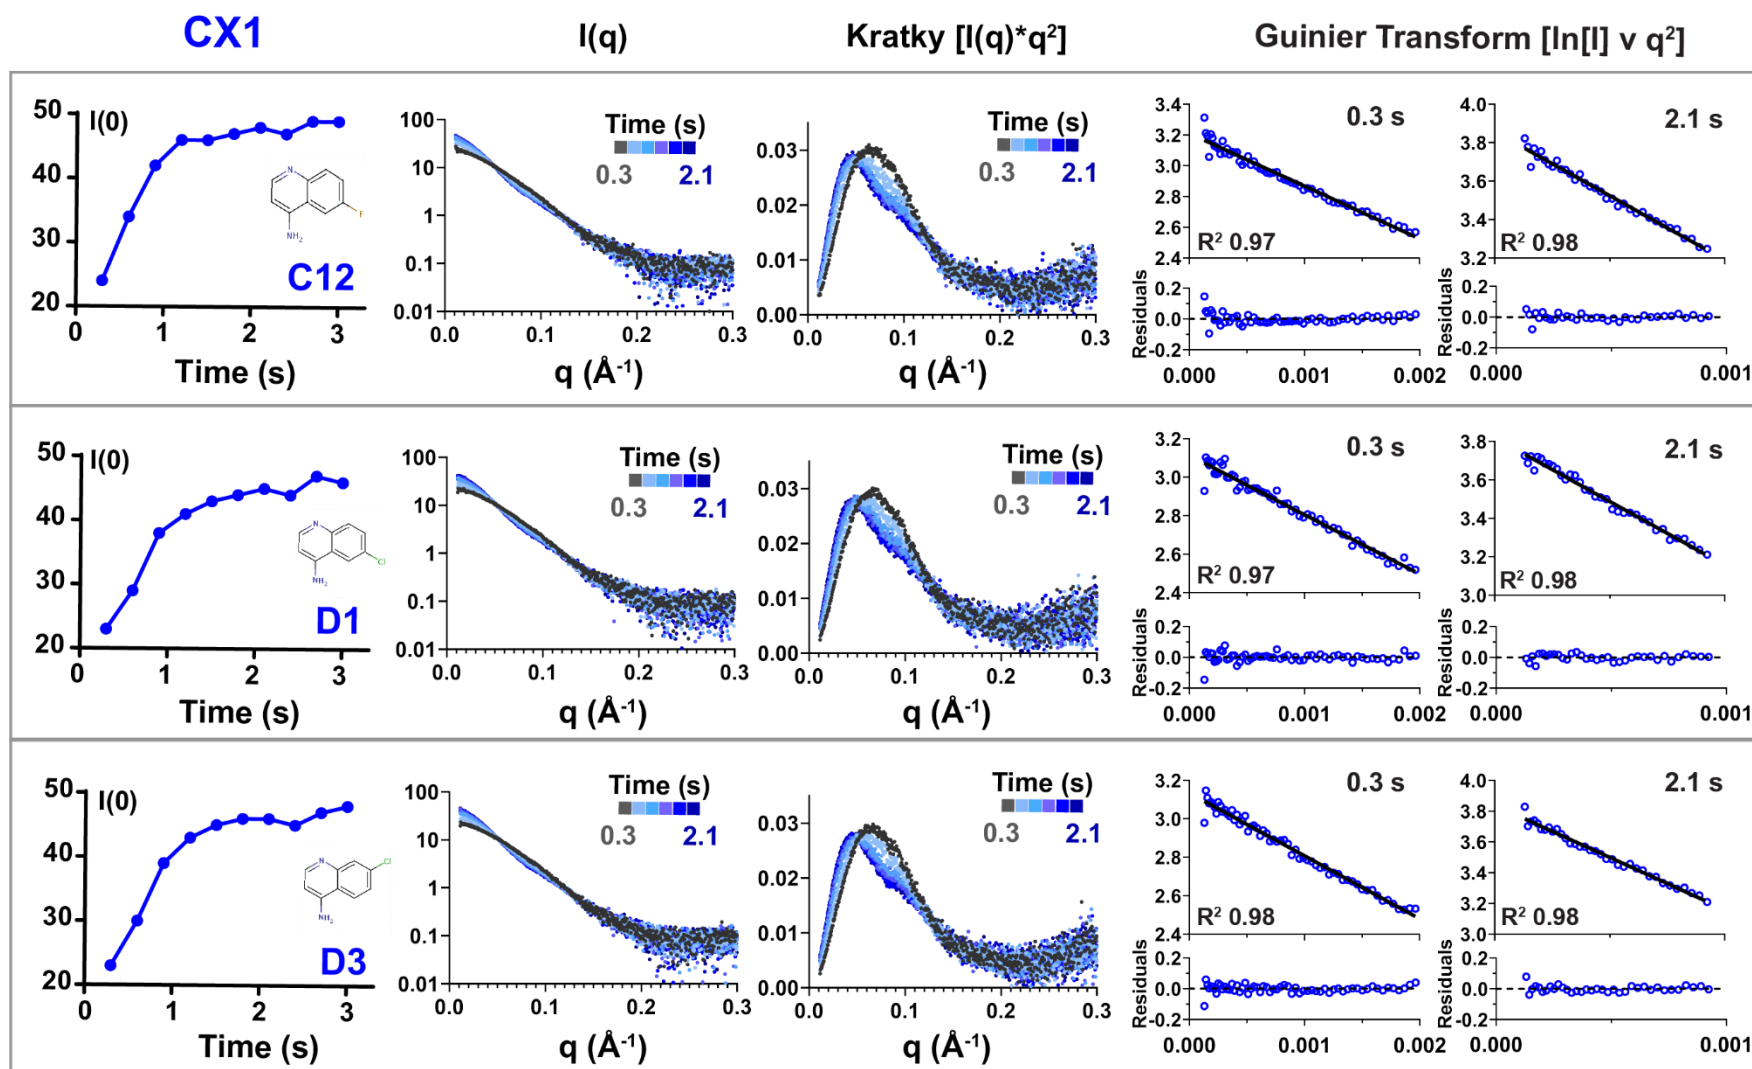

**Supplementary Figure 2. TR-SAXS characterization of the CX1 chemotype.** Overlays of I(q) and Kratky transforms at 0.3, 0.6, 1.2, 1.5, 1.8, and 2.1 s. Linear Guinier transforms at initial and final exposures indicate absent aggregation.

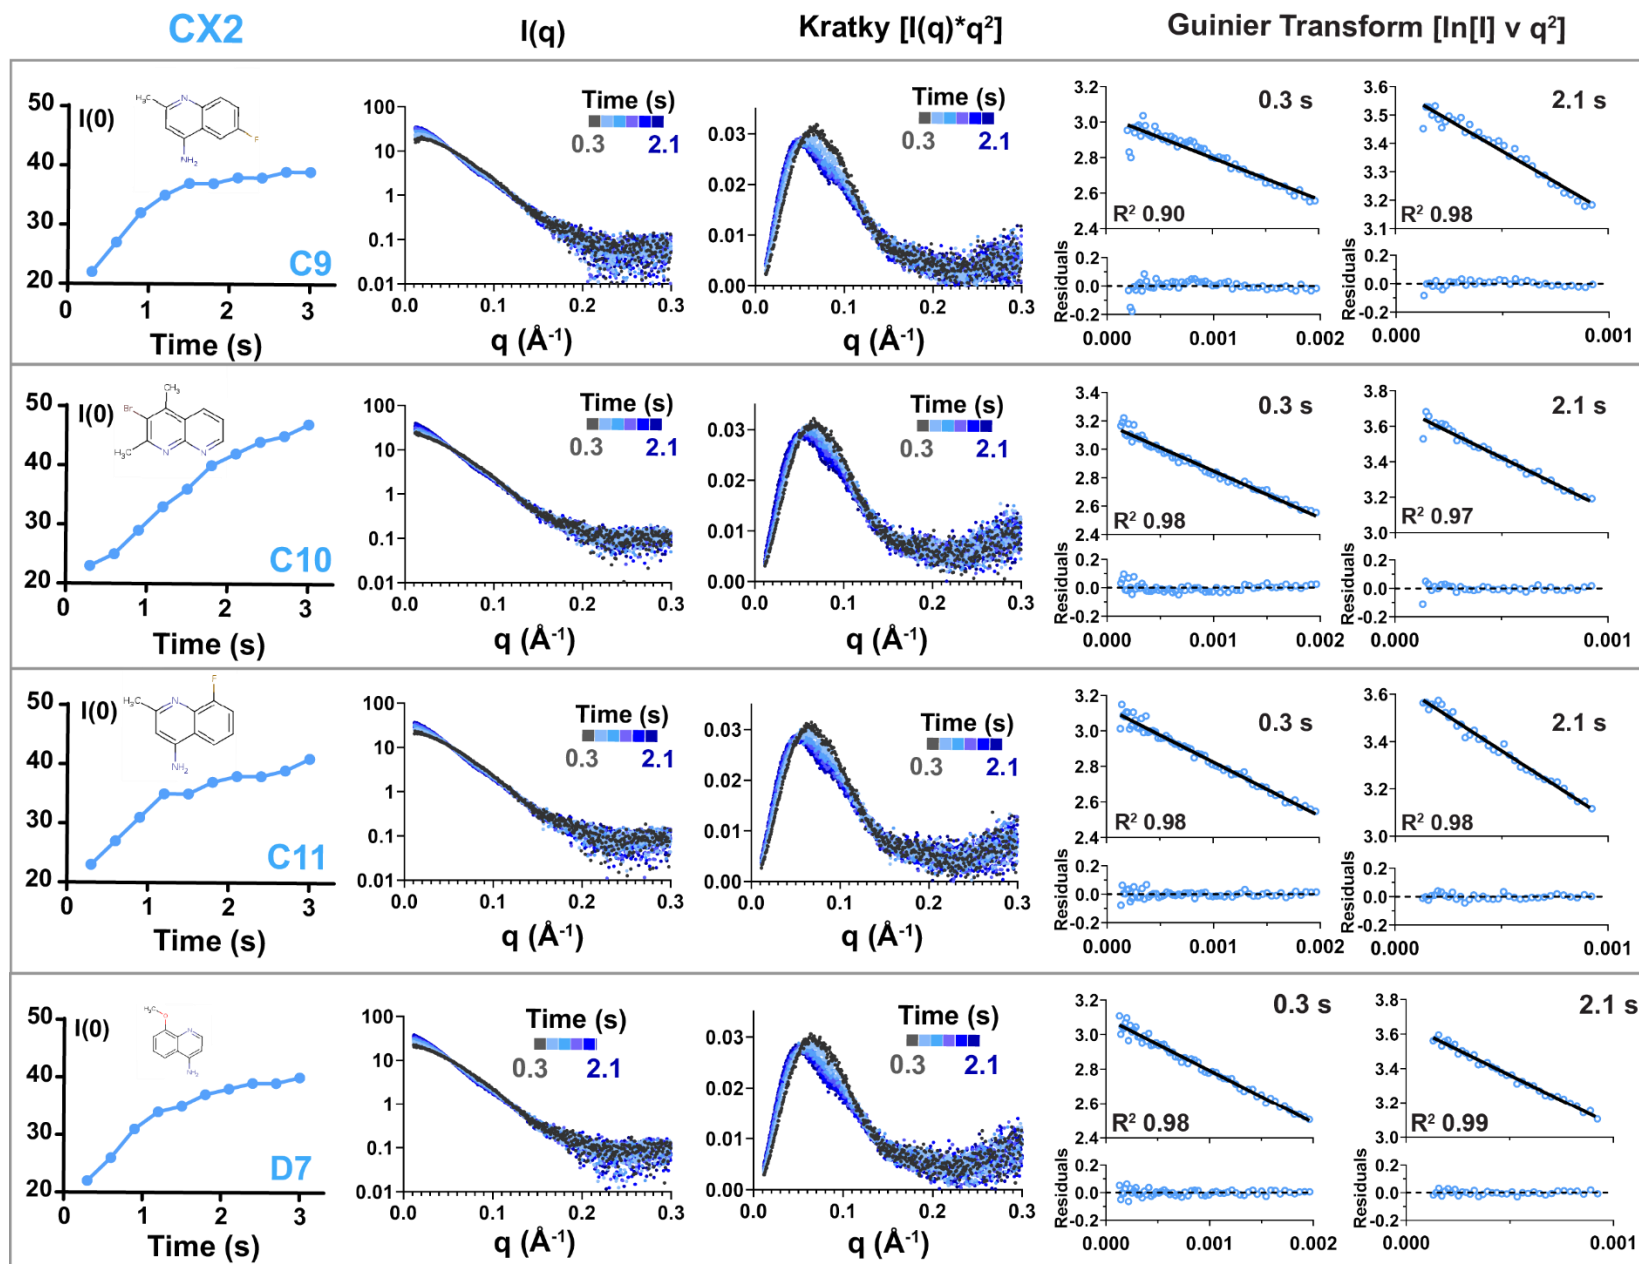

Supplementary Figure 3. TR-SAXS characterization of the CX2 chemotype (C9-D7). Overlays of  $I(q)$  and Kratky transforms at 0.3, 0.6, 1.2, 1.5, 1.8, and 2.1 s. Linear Guinier transforms at initial and final exposures indicate absent aggregation.





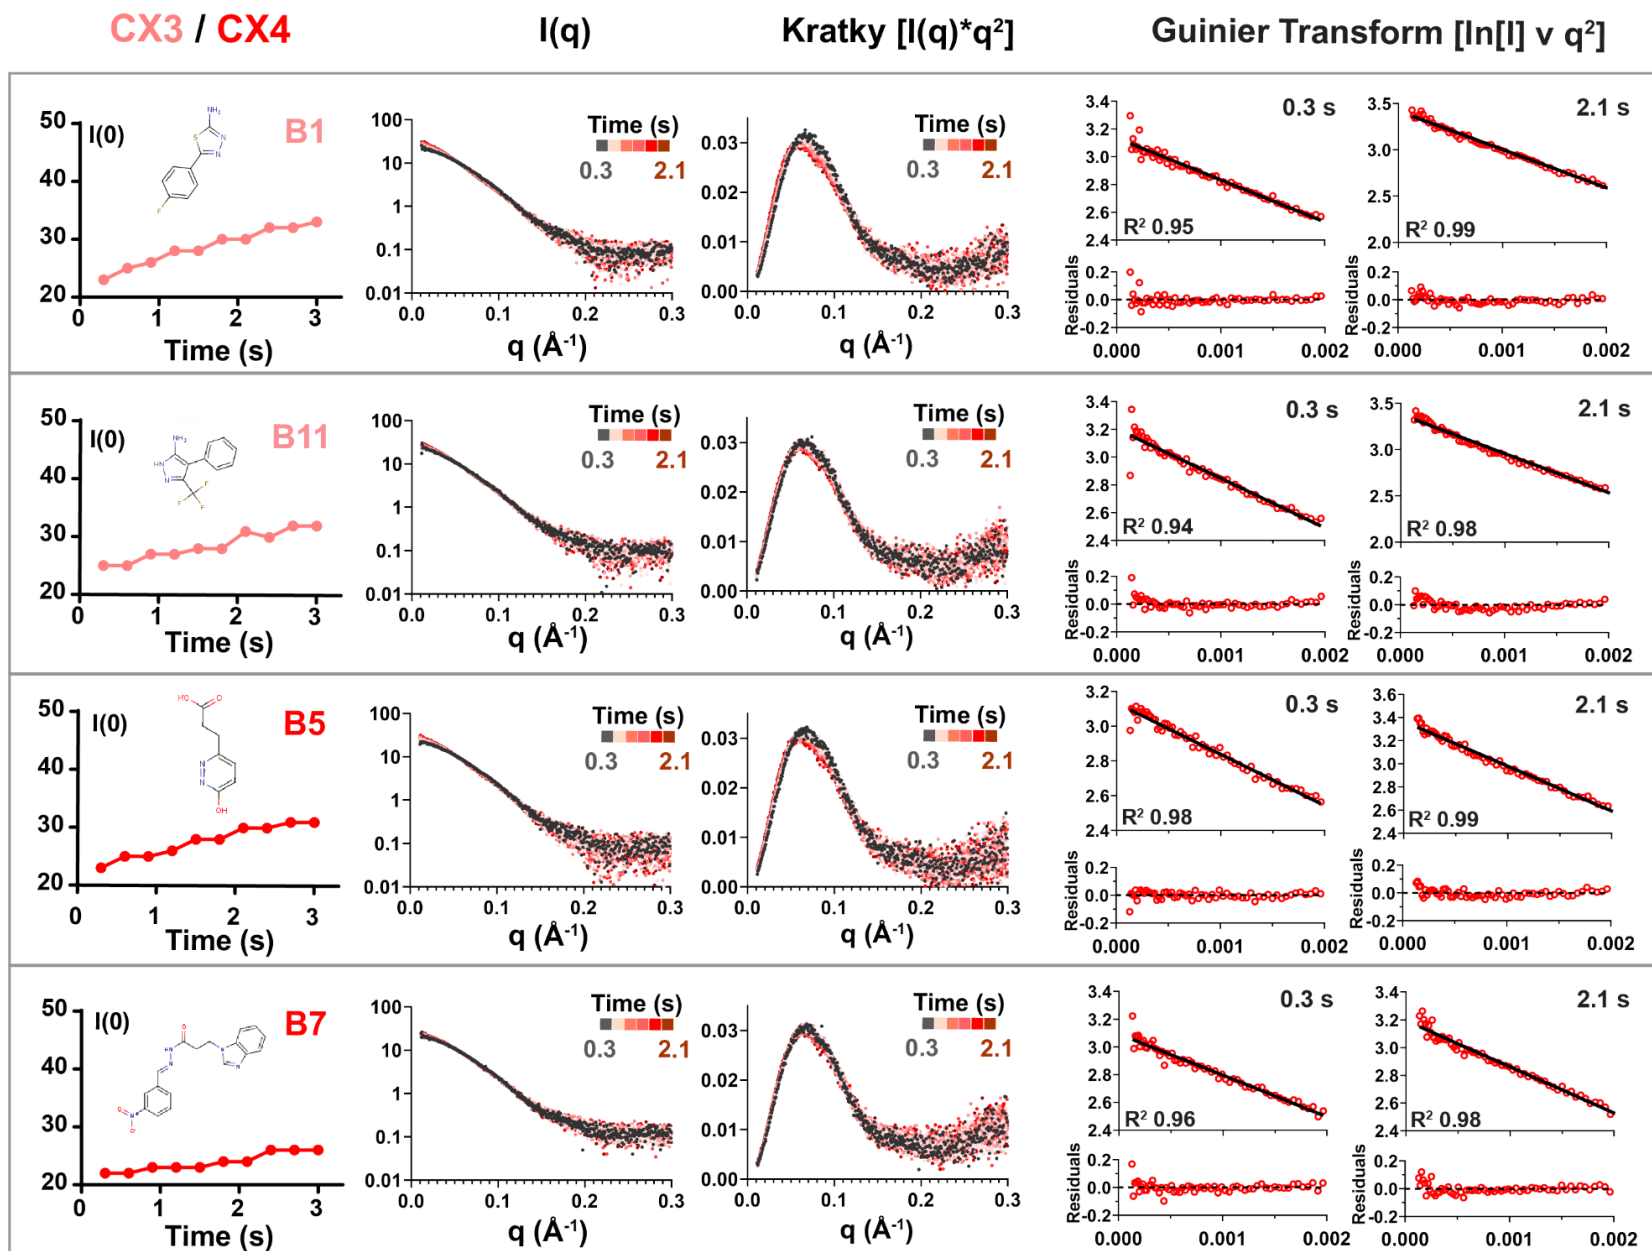

**Supplementary Figure 5. TR-SAXS characterization of the CX3 and CX4 chemotypes.** Overlays of I(q) and Kratky transforms at 0.3, 0.6, 1.2, 1.5, 1.8, and 2.1 s. Linear Guinier transforms at initial and final exposures indicate absent aggregation.

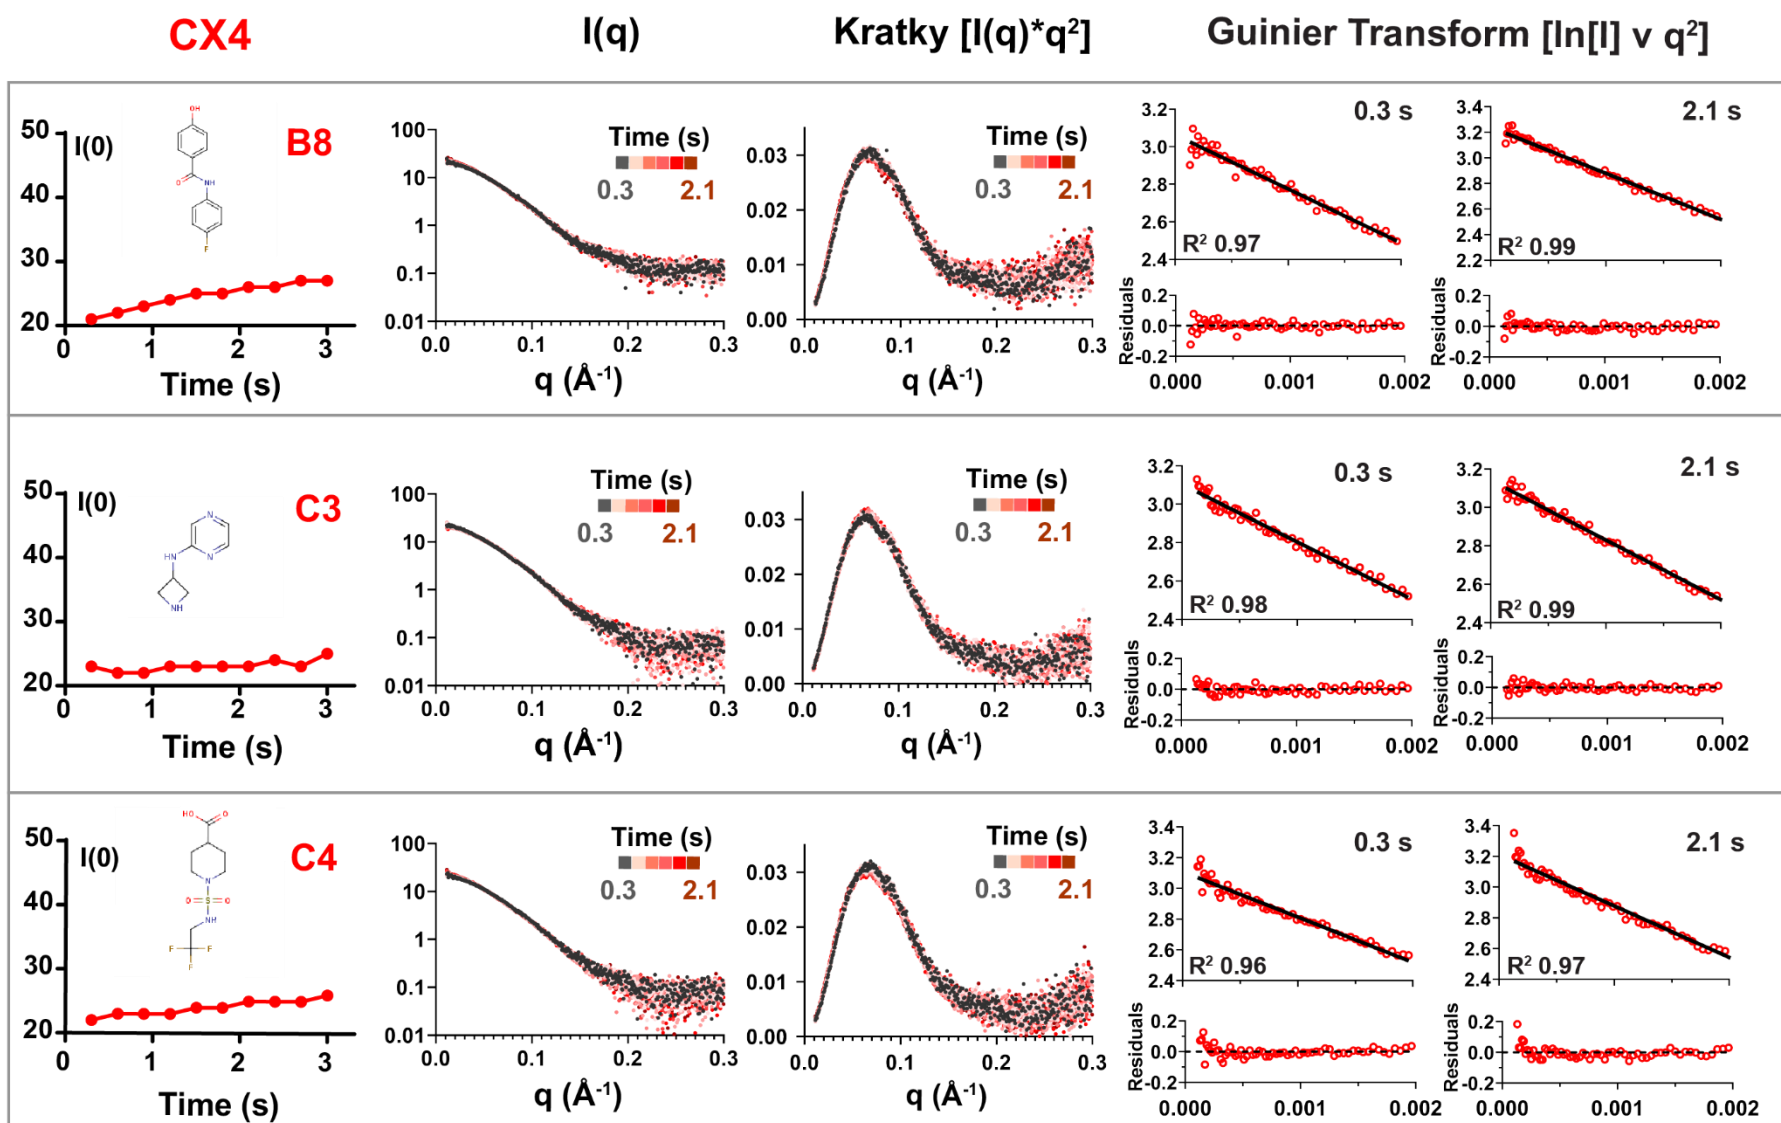

**Supplementary Figure 6. TR-SAXS characterization of the CX4 chemotype (B8-C4).** Overlays of I(q) and Kratky transforms at 0.3, 0.6, 1.2, 1.5, 1.8, and 2.1 s. Linear Guinier transforms at initial and final exposures indicate absent aggregation.



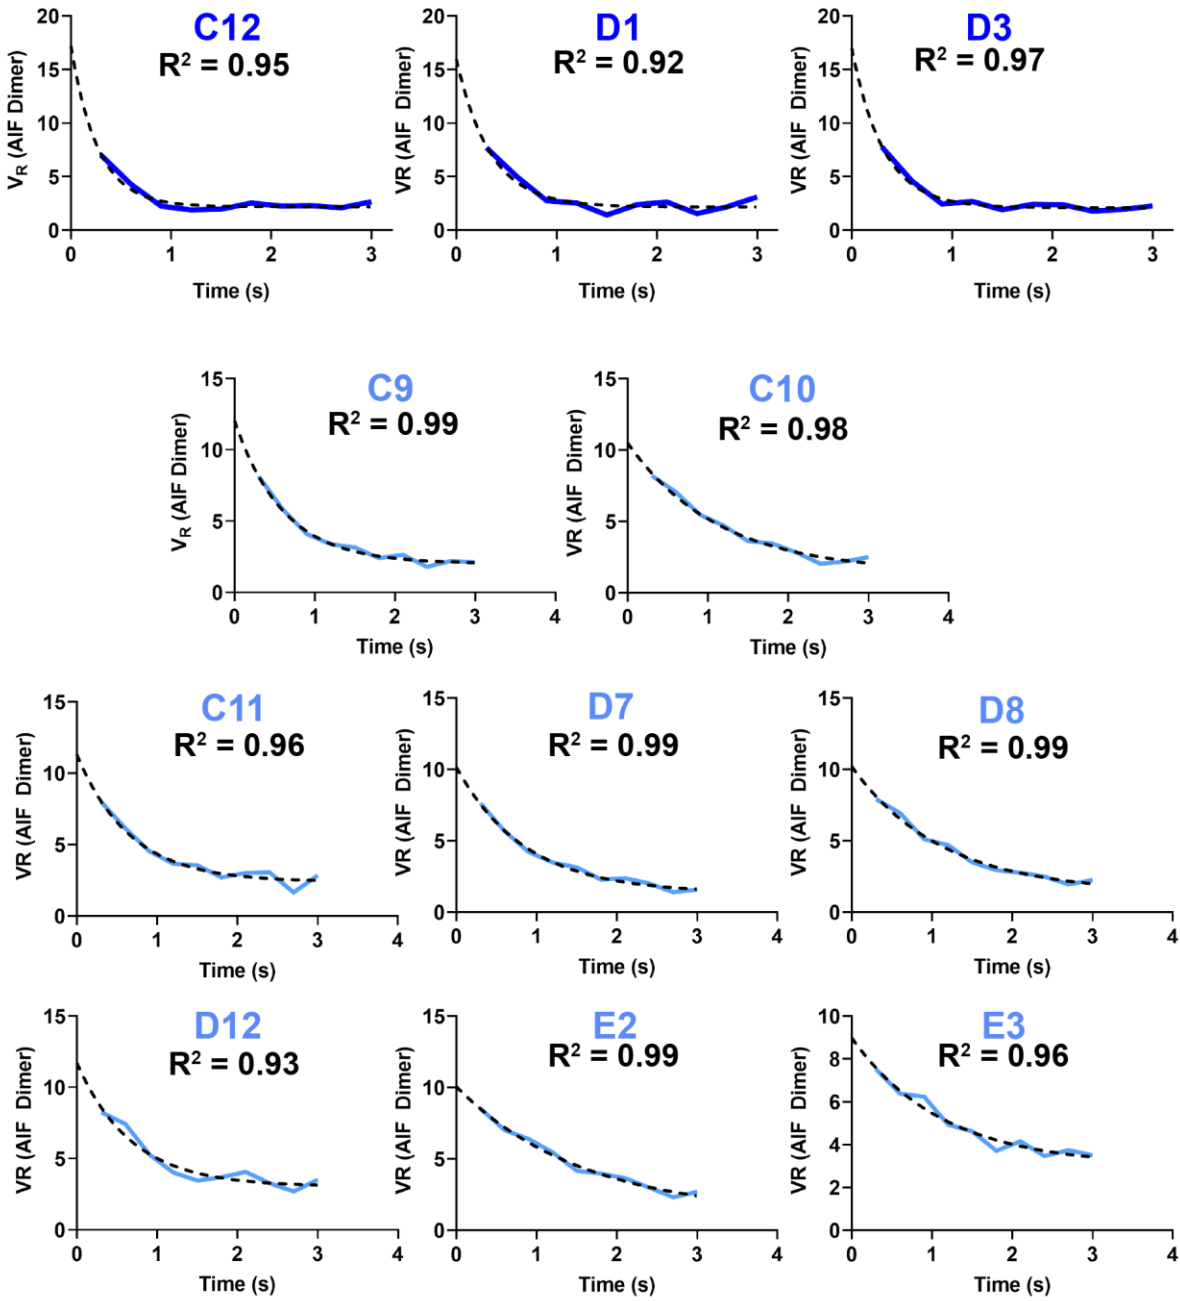

Supplementary Figure 7. SAXS  $k_{VR}$  exponential fits for CX1 and CX2 chemotypes.

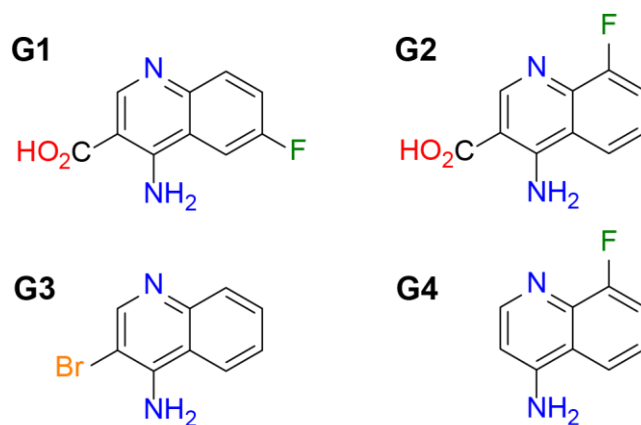

**Supplementary Figure 8. Counter SAR from 4-aminoquinolines excluded from GL2500 HT-DSF screening hits.**

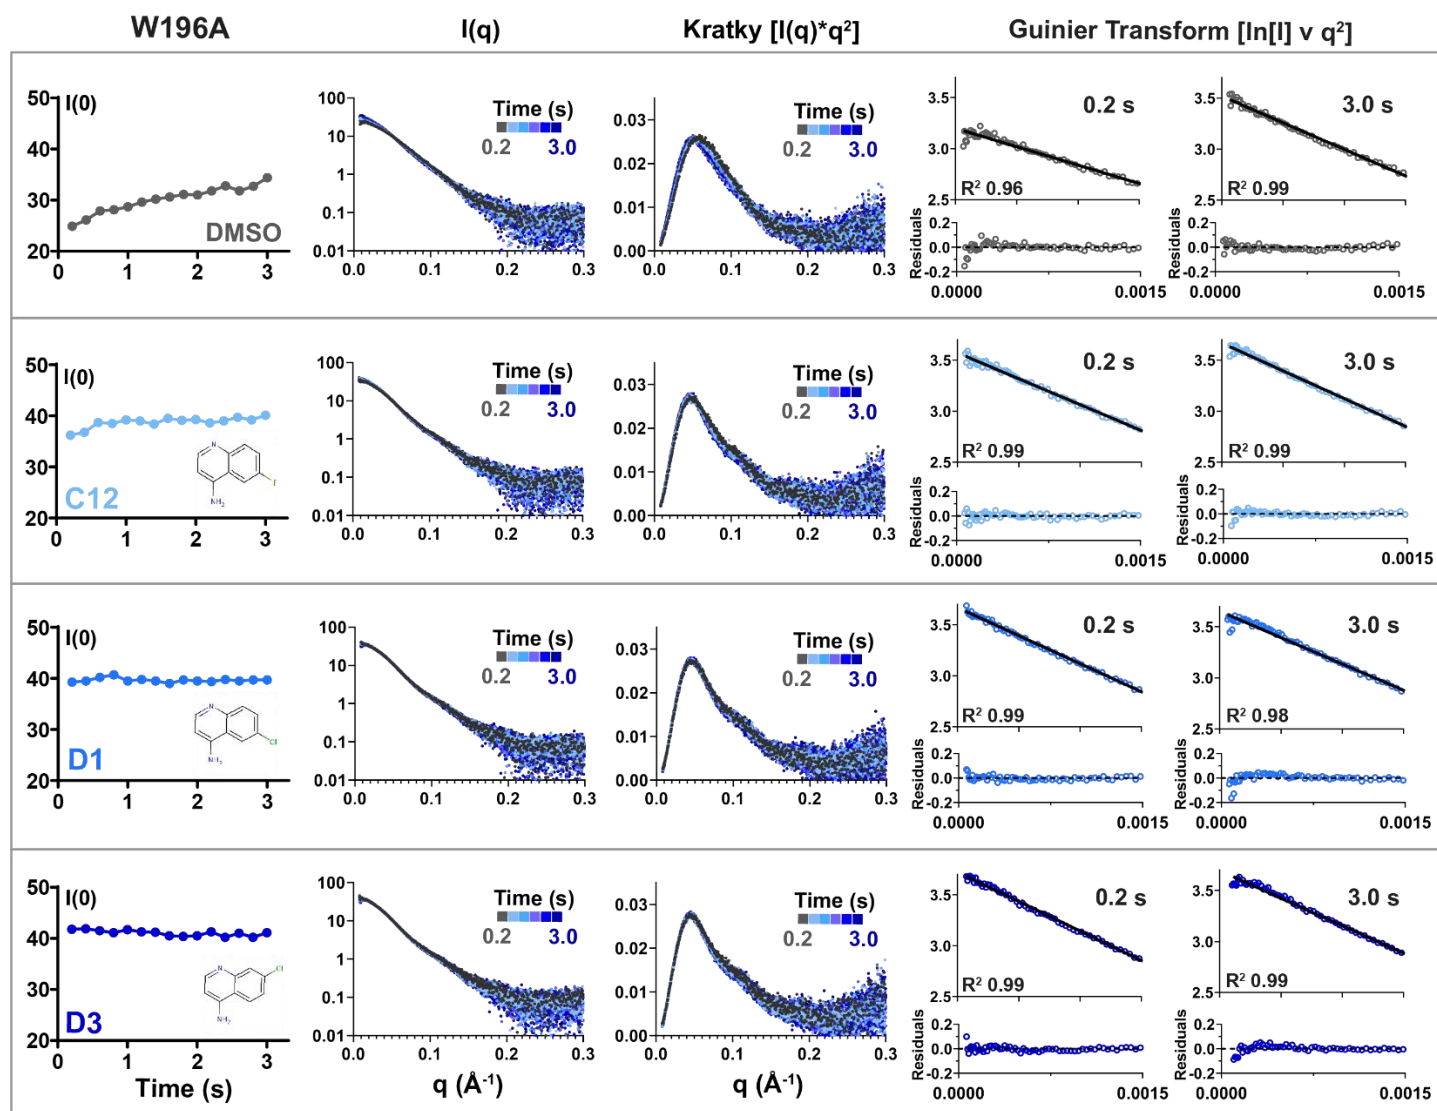

**Supplementary Figure 9. TR-SAXS characterization W196A with CX1 chemotype fragments.** Overlays of I(q) scattering curves and Kratky transforms from 0.2-s exposures collected over 3.0 s. Linear Guinier transforms at initial (0.2 s) and final (3.0 s) exposures indicate absent aggregation.

### AIF-W196A

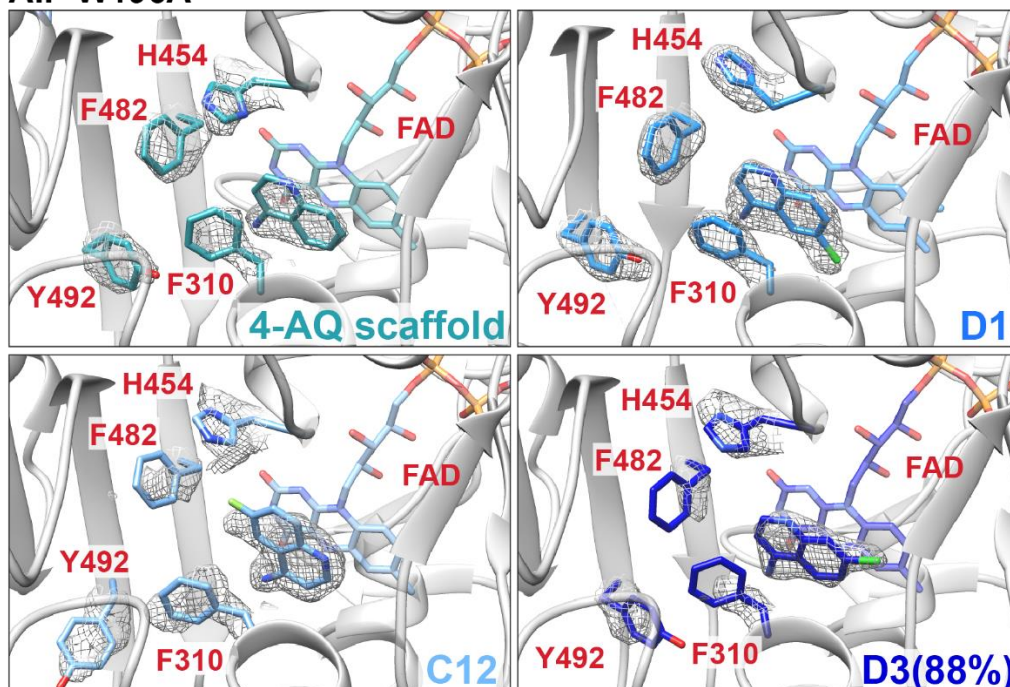

### AIF-WT

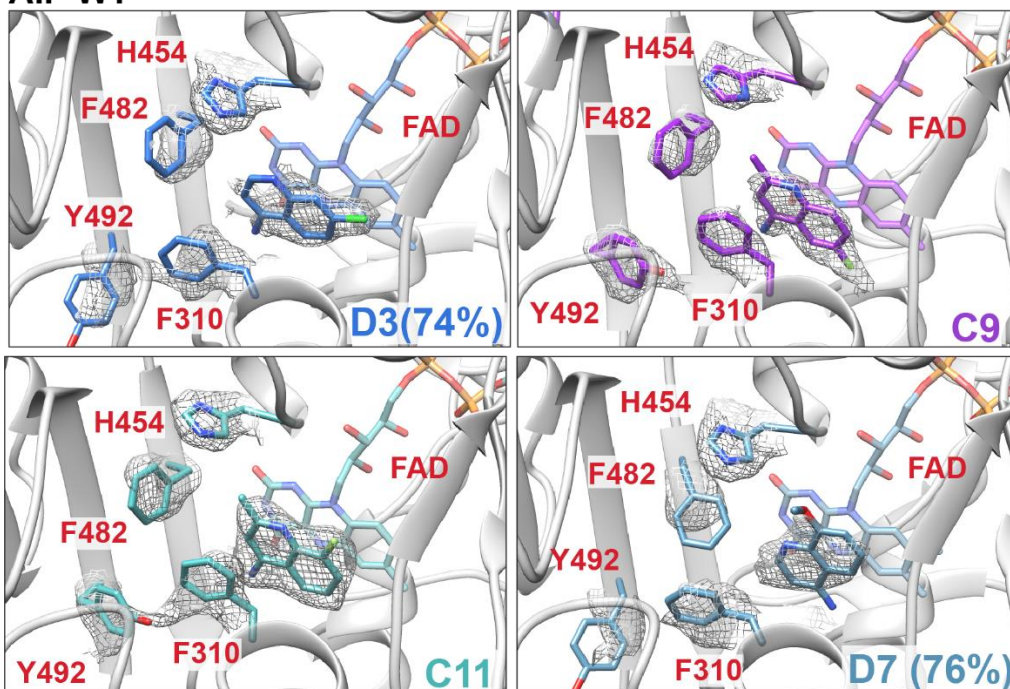

**Supplementary Figure 10. AIF-WT and AIF-W196A active site SA-omit maps.** Views of AIF's active site with simulated-annealing (SA) composite omit maps calculated with omission of ligands and residues H454, F482, F310, and Y492. Refined ligand occupancies less than 100% are indicated in parentheses. Maps are displayed at  $1\sigma$  within 2.0 Å of selected ligands and residues for Monomer A with the exception of AIF-WT-C11, which displays Monomer B.

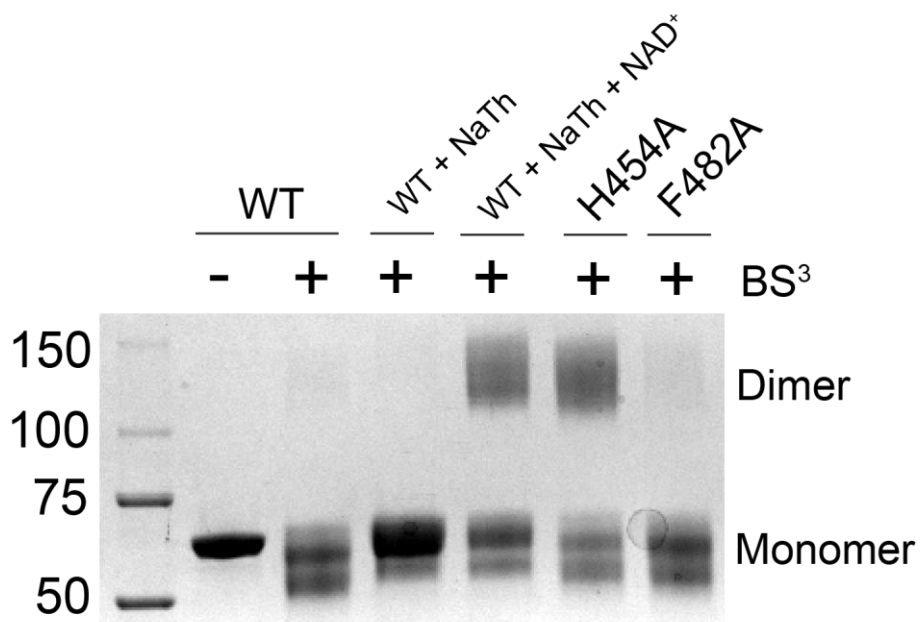

- NADH

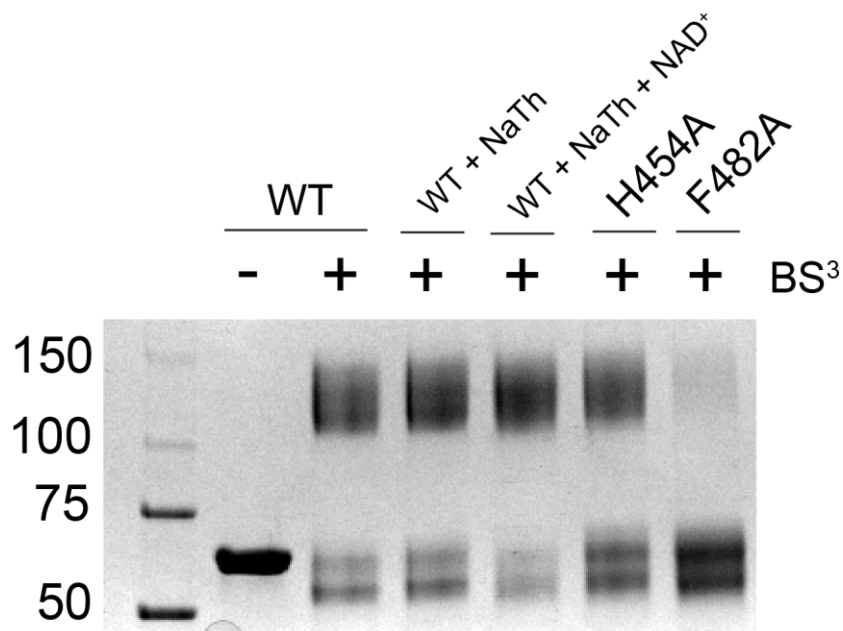

+ NADH

**Supplementary Figure 11. Uncropped SDS-PAGE gels of wild-type and mutant AIF cross-linking reactions.** Lanes containing AIF-WT and sodium dithionite (NaTh) are from a separate study.

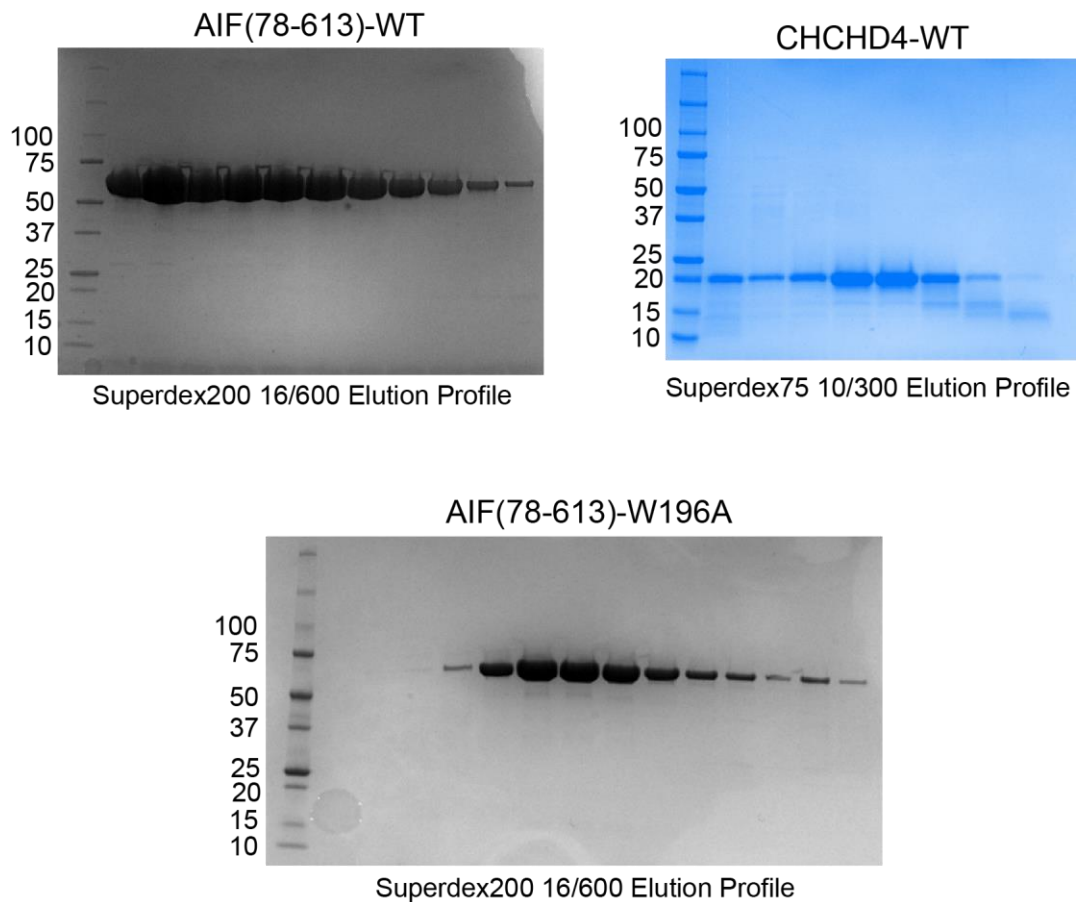

**Supplementary Figure 12. SDS-PAGE analysis of AIF-WT, AIF-W196A, and CHCHD4 SEC profiles.** AIF-WT and AIF-W196A run at their expected molecular weight of 60 kDa. The C-terminus of CHCHD4 is enriched in negatively charged amino acids causing it to run at a higher molecular weight relative to mass of 16 kDa. The displayed gels are representative of at least 3 independent protein purifications.



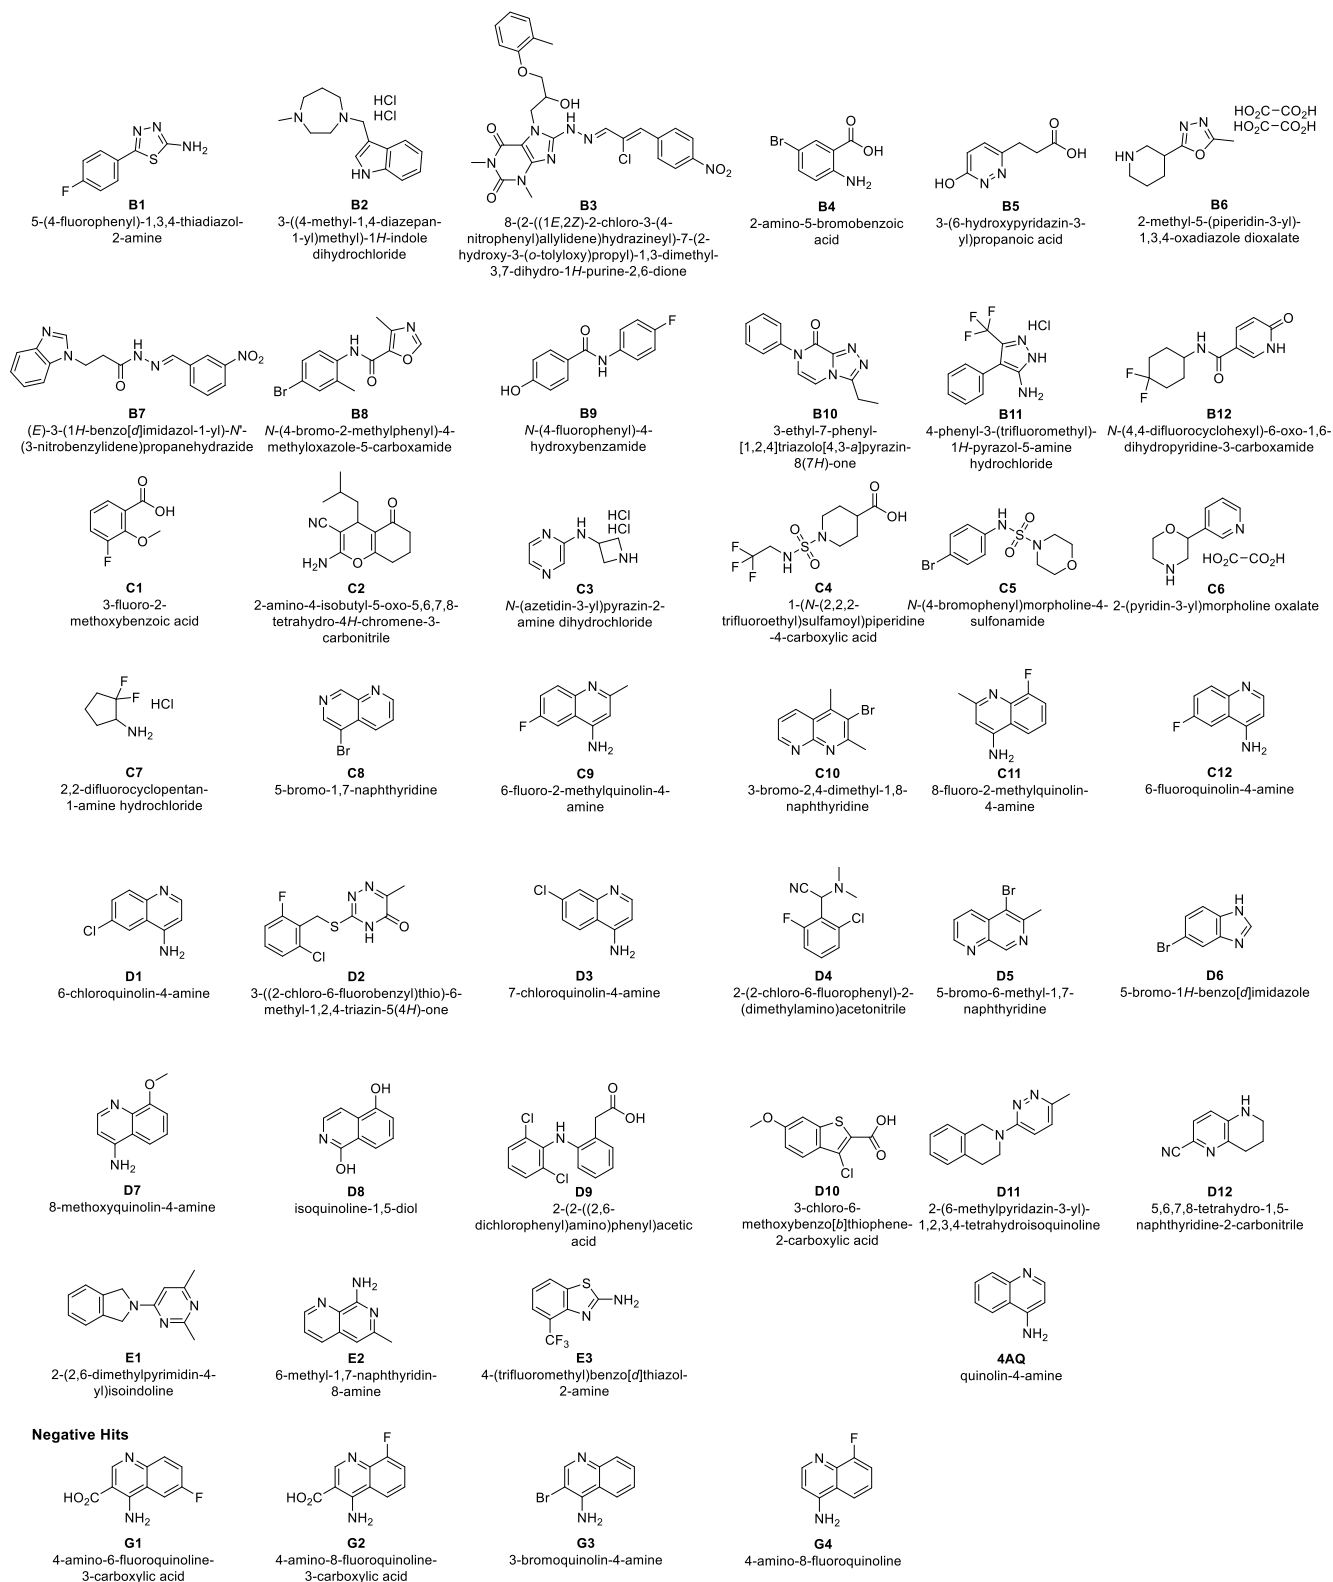

**Supplementary Figure 13. Chemical 2D Diagrams of GL2500 Fragment Hits and 4-aminoquinoline scaffold.** Overview of all chemical structures reported in the manuscript, including negative screening hits G1-G4.

AIF (78-613)-WT

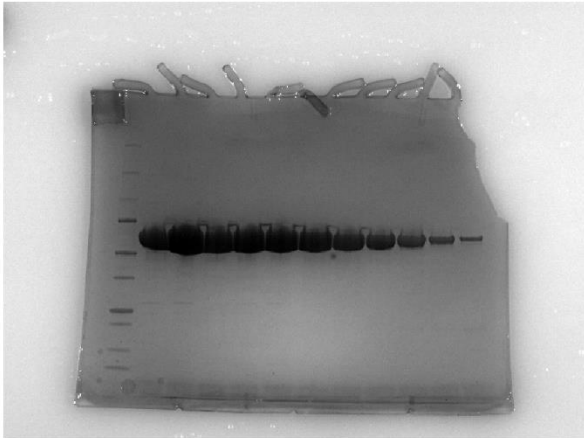

AIF (78-613)-W196A

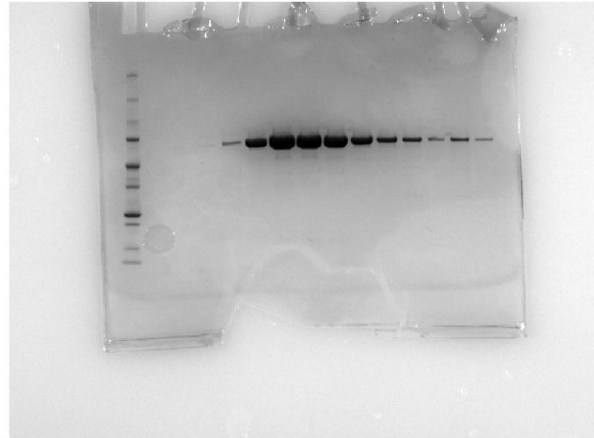

CHCHD4-WT

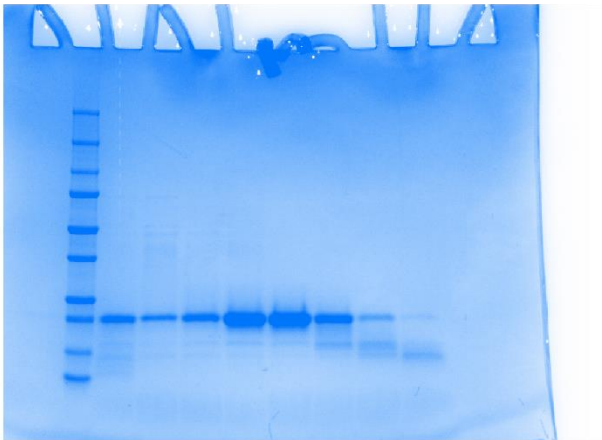

Supplementary Figure 14. Uncropped gel images from Supplementary Fig. 12.

## Supplementary Table 1. Small Molecule Screening Data

| Category | Parameter                           | Description                                                                                                                                                                                                                                                                                                                                                                                                                                                                                      |
|----------|-------------------------------------|--------------------------------------------------------------------------------------------------------------------------------------------------------------------------------------------------------------------------------------------------------------------------------------------------------------------------------------------------------------------------------------------------------------------------------------------------------------------------------------------------|
| Assay    | Type of assay                       | <i>In vitro</i> differential scanning fluorescence                                                                                                                                                                                                                                                                                                                                                                                                                                               |
|          | Target                              | Apoptosis-inducing factor, mitochondrial (AIFM1, Uniprot O95831)                                                                                                                                                                                                                                                                                                                                                                                                                                 |
|          | Primary measurement                 | Fluorescent detection of SYPRO Orange signal                                                                                                                                                                                                                                                                                                                                                                                                                                                     |
|          | Key reagents                        | SYPRO Orange protein gel stain (5000X)<br>ThermoFisher Scientific (Life Technologies), NADH (Sigma-Aldrich)                                                                                                                                                                                                                                                                                                                                                                                      |
|          | Assay protocol                      | See Methods section - <i>High-throughput DSF Screening</i>                                                                                                                                                                                                                                                                                                                                                                                                                                       |
|          | Additional comments                 | Mashalidis, <i>et al</i> (doi:10.1038/nprot.2013.130) provides additional information for performing HT-DSF screening assays.                                                                                                                                                                                                                                                                                                                                                                    |
| Library  | Library size                        | 2500 compounds                                                                                                                                                                                                                                                                                                                                                                                                                                                                                   |
|          | Library composition                 | The GL2500 library is distributed among the following fragment libraries offered by Life Chemicals: brominated (19%), fluorinated (19%), protein–protein interaction disruptors (PPI) (15%), Fsp3-enriched (fragments containing sp3 hybridized carbon units) (19%), and Superior (fragments designed for solubility, low toxicity and cell permeability) (27%). Fragments were chosen for chemical diversity, absence of PAINS liabilities, and predicted favorable physicochemical properties. |
|          | Source                              | Life Chemicals                                                                                                                                                                                                                                                                                                                                                                                                                                                                                   |
|          | Additional comments                 | The library was purchased pre-dispensed into 96-deep-well blocks at 10 mg/mL (15-30 mM) in deuterated DMSO and stored at -30°C. Further details on library composition and its applications can be found in Moiani, <i>et al</i> (doi: 0.1016/bs.mie.2021.09.003).                                                                                                                                                                                                                               |
| Screen   | Format                              | 384-well PCR plates (Thermo Fisher)                                                                                                                                                                                                                                                                                                                                                                                                                                                              |
|          | Concentration(s) tested             | 0.75-1.5 mM (0.5 mg/mL), 5% DMSO                                                                                                                                                                                                                                                                                                                                                                                                                                                                 |
|          | Plate controls                      | Each PCR plate contained 4 AIF controls repeated in triplicate – buffer, 5% DMSO, 83 μM NADH, 83 μM NADH + 5% DMSO                                                                                                                                                                                                                                                                                                                                                                               |
|          | Reagent/ compound dispensing system | Beckman Biomek FX liquid-handling system                                                                                                                                                                                                                                                                                                                                                                                                                                                         |
|          | Detection instrument and software   | Applied Biosystems QuantStudio 6 Flex Real-Time PCR instrument                                                                                                                                                                                                                                                                                                                                                                                                                                   |
|          | Assay validation/QC                 | Standard deviation of DMSO controls, CV across plates (see also Figure S1).                                                                                                                                                                                                                                                                                                                                                                                                                      |

|                   |                                          |                                                                                                                                                                                                                                                                                                                                                |
|-------------------|------------------------------------------|------------------------------------------------------------------------------------------------------------------------------------------------------------------------------------------------------------------------------------------------------------------------------------------------------------------------------------------------|
|                   | Correction factors                       | N/A                                                                                                                                                                                                                                                                                                                                            |
|                   | Normalization                            | N/A                                                                                                                                                                                                                                                                                                                                            |
|                   | Additional comments                      | Optimization and production HT-DSF screens were performed at the former Center for Molecular Structure and Function (CMSF) core at M.D. Anderson Cancer Center                                                                                                                                                                                 |
| Post-HTS analysis | Hit criteria                             | Hits were selected as...<br>$ \Delta T_m  =  T_m(\text{compound}) - T_m(\text{AIF-DMSO-control}) $<br>$ \Delta T_m  > 1.5 \times \text{SD}(\text{AIF-DMSO-control}, N=216)$                                                                                                                                                                    |
|                   | Hit rate                                 | 1%, $\Delta T_m > 1.5 \times \text{SD}$   2.4%, $\Delta T_m < 1.5 \times \text{SD}$                                                                                                                                                                                                                                                            |
|                   | Additional assay(s)                      | Differential scanning fluorescence, microscale thermophoresis, small-angle X-ray scattering                                                                                                                                                                                                                                                    |
|                   | Confirmation of hit purity and structure | The following top-ranking hits were re-purchased from Life Chemicals for follow-up analysis: F2156-0068 (C12), F2156-0057 (D1), F9995-2431 (D3).<br><br>The following hits were verified by X-ray crystallography in complex with AIF: F2156-0068 (C12), F2156-0057 (D1), F9995-2431 (D3), F2156-0070 (C9), F2156-0047 (C11), F2183-0014 (D7). |
|                   | Additional comments                      |                                                                                                                                                                                                                                                                                                                                                |

**Supplementary Table 2. AIF HT-DSF GL2500 Fragment Hits.** Screening and verification  $T_m$  shifts and MST amplitudes for the top 39 fragment-binders from the GL2500 HT-DSF screen. Fragments in bold exhibited binding in at least one verification assay. Significance thresholds of three standard deviations relative to AIF-DMSO are 1.7°C (HT-DSF), 0.7°C (DSF), and 960.5 response units (MST).

| Compound          | Group              | Reference ID | HT-DSF            | DSF               | MST           |
|-------------------|--------------------|--------------|-------------------|-------------------|---------------|
|                   |                    |              | $\Delta T_m$ (°C) | $\Delta T_m$ (°C) | Amplitude     |
| <b>F0345-3713</b> | <b>Fluorinated</b> | <b>B1</b>    | <b>3.0</b>        | <b>-0.5</b>       | <b>966.3</b>  |
| F6541-5066        | Superior           | B2           | 2.9               | 0.3               | 955.7         |
| <b>F0823-0057</b> | <b>PPI</b>         | <b>B3</b>    | <b>2.8</b>        | <b>-8.4</b>       | <b>952.0</b>  |
| F1980-0013        | Brominated         | B4           | 2.5               | -0.1              | 955.6         |
| <b>F1967-1331</b> | <b>PPI</b>         | <b>B5</b>    | <b>2.5</b>        | <b>1.3</b>        | <b>1003.1</b> |
| F2184-0232        | Superior           | B6           | 2.4               | -0.1              | 951.1         |
| <b>F1092-1243</b> | <b>PPI</b>         | <b>B7</b>    | <b>2.3</b>        | <b>0.3</b>        | <b>975.8</b>  |
| <b>F0664-0094</b> | <b>Brominated</b>  | <b>B8</b>    | <b>2.2</b>        | <b>1.4</b>        | <b>952.7</b>  |
| F3098-2193        | Fluorinated        | B9           | 2.1               | -0.1              | 957.7         |
| F3222-2571        | Superior           | B10          | 2.0               | 0.2               | 953.9         |
| <b>F2130-0094</b> | <b>Fluorinated</b> | <b>B11</b>   | <b>2.0</b>        | <b>-0.3</b>       | <b>963.5</b>  |
| F6559-1405        | Fluorinated        | B12          | 1.9               | 0.3               | 952.3         |
| <b>F0001-2710</b> | <b>Fluorinated</b> | <b>C1</b>    | <b>1.9</b>        | <b>0.8</b>        | <b>954.5</b>  |
| <b>F0894-0163</b> | <b>Fsp3</b>        | <b>C2</b>    | <b>1.8</b>        | <b>0.7</b>        | <b>953.5</b>  |
| <b>F2167-2742</b> | <b>Superior</b>    | <b>C3</b>    | <b>1.7</b>        | <b>0.7</b>        | <b>970.6</b>  |
| <b>F1906-0093</b> | <b>PPI</b>         | <b>C4</b>    | <b>1.7</b>        | <b>2.1</b>        | <b>952.7</b>  |
| F3083-0166        | Brominated         | C5           | 1.7               | -0.2              | 955.3         |
| <b>F2135-1123</b> | <b>Superior</b>    | <b>C6</b>    | <b>1.7</b>        | <b>0.8</b>        | <b>957.2</b>  |
| <b>F8888-6524</b> | <b>Fluorinated</b> | <b>C7</b>    | <b>1.7</b>        | <b>1.2</b>        | <b>950.6</b>  |
| <b>F1957-0058</b> | <b>Brominated</b>  | <b>C8</b>    | <b>-9.4</b>       | <b>-9.9</b>       | <b>955.1</b>  |
| <b>F2156-0070</b> | <b>Fluorinated</b> | <b>C9</b>    | <b>-5.6</b>       | <b>-4.8</b>       | <b>966.6</b>  |
| <b>F1957-0061</b> | <b>Brominated</b>  | <b>C10</b>   | <b>-5.6</b>       | <b>-6.5</b>       | <b>954.5</b>  |
| <b>F2156-0047</b> | <b>Fluorinated</b> | <b>C11</b>   | <b>-5.0</b>       | <b>-3.5</b>       | <b>1036.9</b> |
| <b>F2156-0068</b> | <b>Fluorinated</b> | <b>C12</b>   | <b>-4.6</b>       | <b>-4.2</b>       | <b>1022.3</b> |
| <b>F2156-0057</b> | <b>Superior</b>    | <b>D1</b>    | <b>-4.1</b>       | <b>-3.3</b>       | <b>958.9</b>  |
| <b>F1894-0242</b> | <b>Fluorinated</b> | <b>D2</b>    | <b>-3.8</b>       | <b>-1.9</b>       | <b>954.4</b>  |
| <b>F9995-2431</b> | <b>Superior</b>    | <b>D3</b>    | <b>-3.7</b>       | <b>-3.6</b>       | <b>967.0</b>  |
| <b>F2189-0161</b> | <b>Fluorinated</b> | <b>D4</b>    | <b>-3.2</b>       | <b>-2.1</b>       | <b>951.1</b>  |
| <b>F1957-0186</b> | <b>Brominated</b>  | <b>D5</b>    | <b>-2.9</b>       | <b>-1.3</b>       | <b>953.2</b>  |
| <b>F2163-0004</b> | <b>Brominated</b>  | <b>D6</b>    | <b>-2.5</b>       | <b>-2.0</b>       | <b>959.9</b>  |
| <b>F2183-0014</b> | <b>Superior</b>    | <b>D7</b>    | <b>-2.5</b>       | <b>-3.2</b>       | <b>978.3</b>  |
| <b>F2135-0800</b> | <b>Superior</b>    | <b>D8</b>    | <b>-2.5</b>       | <b>-2.7</b>       | <b>974.6</b>  |
| <b>F0722-0745</b> | <b>PPI</b>         | <b>D9</b>    | <b>-2.4</b>       | <b>-1.7</b>       | <b>961.0</b>  |
| <b>F0818-0021</b> | <b>PPI</b>         | <b>D10</b>   | <b>-2.4</b>       | <b>-0.7</b>       | <b>965.7</b>  |
| <b>F6541-1463</b> | <b>Superior</b>    | <b>D11</b>   | <b>-2.4</b>       | <b>-1.5</b>       | <b>969.9</b>  |
| <b>F1957-0100</b> | <b>Superior</b>    | <b>D12</b>   | <b>-2.4</b>       | <b>-2.9</b>       | <b>986.0</b>  |
| <b>F6543-8631</b> | <b>Superior</b>    | <b>E1</b>    | <b>-2.3</b>       | <b>-1.3</b>       | <b>952.0</b>  |
| <b>F1957-0093</b> | <b>Superior</b>    | <b>E2</b>    | <b>-2.2</b>       | <b>-2.2</b>       | <b>991.5</b>  |
| <b>F2169-0129</b> | <b>Fluorinated</b> | <b>E3</b>    | <b>-2.2</b>       | <b>-0.8</b>       | <b>965.1</b>  |

**Supplementary Table 3. SAXS Collection and Analysis Parameters**

| Sample Details                                                                                                                                          |                                                                                                                                                          | AIF-WT                                                                  | AIF-W196A                                                               |
|---------------------------------------------------------------------------------------------------------------------------------------------------------|----------------------------------------------------------------------------------------------------------------------------------------------------------|-------------------------------------------------------------------------|-------------------------------------------------------------------------|
| Organism                                                                                                                                                |                                                                                                                                                          | <i>H. sapiens</i>                                                       | <i>H. sapiens</i>                                                       |
| Source                                                                                                                                                  |                                                                                                                                                          | <i>E. coli</i> expressed<br>(Brosey <i>et al.</i> , 2016 <sup>1</sup> ) | <i>E. coli</i> expressed<br>(Brosey <i>et al.</i> , 2016 <sup>1</sup> ) |
| UniProt ID (residues in construct)                                                                                                                      |                                                                                                                                                          | O95831 (78-613)                                                         | O95831 (78-613)                                                         |
| Extinction coefficient (FAD)<br>( $A_{450}$ , $M^{-1} \text{ cm}^{-1}$ )                                                                                |                                                                                                                                                          | 13,400 <sup>2</sup>                                                     | 13,400 <sup>2</sup>                                                     |
| $\bar{v}$ from chemical composition ( $\text{cm}^3 \text{ g}^{-1}$ )                                                                                    |                                                                                                                                                          | 0.739                                                                   | 0.739                                                                   |
| Particle contrast from sequence and solvent components,<br>$\Delta\rho$ ( $\rho_{\text{protein}} - \rho_{\text{solvent}}$ ; $10^{10} \text{ cm}^{-2}$ ) |                                                                                                                                                          | 2.82 (12.23 – 9.46)                                                     | 2.82 (12.23 – 9.46)                                                     |
| Mr from chemical composition (Da)                                                                                                                       |                                                                                                                                                          | 60,237                                                                  | 59,335                                                                  |
| Solvent (buffer for subtraction taken from preparatory SEC<br>flowthrough prior to elution of protein)                                                  |                                                                                                                                                          | 25 mM HEPES, pH 7.5,<br>150 mM NaCl                                     | 25 mM HEPES, pH 7.5,<br>150 mM NaCl                                     |
| HT-SAXS samples concentrations                                                                                                                          |                                                                                                                                                          | 4 mg/mL                                                                 | 4 mg/mL                                                                 |
| HT-SAXS sample volume                                                                                                                                   |                                                                                                                                                          | 30 $\mu\text{L}$                                                        | 30 $\mu\text{L}$                                                        |
| <b>SAXS Data-Collection Parameters</b>                                                                                                                  |                                                                                                                                                          |                                                                         |                                                                         |
| Instrument/data processing                                                                                                                              | Advanced Light Source (ALS) SIBYLS SAXS beamline (12.3.1) with Dectris Pilatus3 2M Detector <sup>3</sup>                                                 |                                                                         |                                                                         |
| Wavelength ( $\text{\AA}$ )                                                                                                                             | 1.27                                                                                                                                                     |                                                                         |                                                                         |
| Beam size ( $\mu\text{m}$ )                                                                                                                             | Converging beam, 500x2000 at sample, 100x100 at detector                                                                                                 |                                                                         |                                                                         |
| Camera length (m)                                                                                                                                       | 1.5                                                                                                                                                      |                                                                         |                                                                         |
| $q$ measurement range ( $\text{\AA}^{-1}$ )                                                                                                             | 0.01–0.59                                                                                                                                                |                                                                         |                                                                         |
| Absolute scaling method                                                                                                                                 | On a detector scale                                                                                                                                      |                                                                         |                                                                         |
| Normalization                                                                                                                                           | To transmitted intensity by beam-stop counter                                                                                                            |                                                                         |                                                                         |
| Monitoring for radiation<br>damage                                                                                                                      | Data and $R_g$ frame-by-frame comparison                                                                                                                 |                                                                         |                                                                         |
| Exposure time                                                                                                                                           | Sequential 0.2-0.3 s exposures for 10 s.                                                                                                                 |                                                                         |                                                                         |
| Sample configuration                                                                                                                                    | Samples were loaded by a multichannel Tecan Evo 100 liquid-handling robot into needle tips containing mica windows. Effective sample path length 1.5 mm. |                                                                         |                                                                         |
| Sample temperature ( $^{\circ}\text{C}$ )                                                                                                               | 10                                                                                                                                                       |                                                                         |                                                                         |
| <b>SAXS Analysis Software</b>                                                                                                                           |                                                                                                                                                          |                                                                         |                                                                         |
| SAXS data reduction                                                                                                                                     | Advanced Light Source (ALS) SIBYLS SAXS beamline (12.3.1) with Dectris Pilatus3 2M Detector <sup>3</sup>                                                 |                                                                         |                                                                         |
| Extinction coefficient<br>estimate                                                                                                                      | <i>ProtParam</i> <sup>4</sup>                                                                                                                            |                                                                         |                                                                         |
| Calculation of $\bar{v}$ and $\Delta\rho$                                                                                                               | MULCh v 1.1.1 <sup>5</sup> ( <a href="https://smb-research.smb.usyd.edu.au/NCVWeb/index.jsp">https://smb-research.smb.usyd.edu.au/NCVWeb/index.jsp</a> ) |                                                                         |                                                                         |
| First-order analyses, $I(0)$ , $R_g$                                                                                                                    | ScÅtter ( <a href="https://bl1231.als.lbl.gov/scatter/">https://bl1231.als.lbl.gov/scatter/</a> ), Primus/qt ATSAS 3.0.1 <sup>6</sup>                    |                                                                         |                                                                         |
| Graph visual display                                                                                                                                    | Microsoft Excel, GraphPad Prism 9.0                                                                                                                      |                                                                         |                                                                         |
| <b>SIMPLE SCATTERING ID</b>                                                                                                                             | XS97QA1S (AIF Screening Panel at 0.3 s [oxidized] and 2.1 s [reduced])                                                                                   |                                                                         |                                                                         |



**Supplementary Table 3. SAXS Collection and Analysis Parameters (cont.)**

| <b>Structural Parameters</b>                                     | <b>AIF-WT (0.3 s)</b>       | <b>AIF-WT (2.1 s)</b>        | <b>AIF-WT (3.0 s)</b>        |
|------------------------------------------------------------------|-----------------------------|------------------------------|------------------------------|
| <u>Guinier Analysis</u>                                          |                             |                              |                              |
| I(0)                                                             | 20.80 (0.19)                | 23.54 (0.23)                 | 26.95 (0.28)                 |
| R <sub>g</sub> (Å)                                               | 29.42 (0.39)                | 32.19 (0.44)                 | 33.39 (0.48)                 |
| q <sub>min</sub> (Å <sup>-1</sup> )                              | 0.0137                      | 0.0137                       | 0.0137                       |
| qR <sub>g</sub> max (q <sub>min</sub> = 0.0137 Å <sup>-1</sup> ) | 1.29                        | 1.30                         | 1.29                         |
| Coefficient of correlation, R <sup>2</sup>                       | 1.00                        | 1.00                         | 0.96                         |
| Mass from Porod invariant (Da) <sup>7</sup>                      | 45,582                      | 51,347                       | 52,669                       |
| <u>Real-space Analysis</u>                                       |                             |                              |                              |
| I(0)                                                             | 20.69 (0.69)                | 22.58 (0.72)                 | 26.23 (1.42)                 |
| R <sub>g</sub> (Å)                                               | 30.09 (0.85)                | 32.25 (0.95)                 | 33.98 (1.47)                 |
| D <sub>max</sub> (Å)                                             | 109                         | 113                          | 126                          |
| q range (Å <sup>-1</sup> )                                       | 0.0137 - 0.2338             | 0.0137 - 0.2338              | 0.0137 - 0.2338              |
| χ <sup>2</sup>                                                   | 0.38                        | 0.33                         | 0.33                         |
| Porod volume, V <sub>p</sub> (Å <sup>3</sup> )                   | 101,436                     | 116,936                      | 122,452                      |
| Porod coefficient, P <sub>x</sub>                                | 3.98 (0.15)                 | 3.96 (0.13)                  | 4.04 (0.11)                  |
| <b>Structural Parameters</b>                                     | <b>AIF-WT/ NADH (0.3 s)</b> | <b>AIF-WT / NADH (2.1 s)</b> | <b>AIF-WT / NADH (3.0 s)</b> |
| <u>Guinier Analysis</u>                                          |                             |                              |                              |
| I(0)                                                             | 45.94 (0.49)                | 45.11 (0.49)                 | 48.08 (0.53)                 |
| R <sub>g</sub> (Å)                                               | 42.14 (0.59)                | 42.27 (0.62)                 | 41.69 (0.61)                 |
| q <sub>min</sub> (Å <sup>-1</sup> )                              | 0.0125                      | 0.0125                       | 0.0125                       |
| qR <sub>g</sub> max (q <sub>min</sub> = 0.0125 Å <sup>-1</sup> ) | 1.30                        | 1.28                         | 1.29                         |
| Coefficient of correlation, R <sup>2</sup>                       | 1.00                        | 1.00                         | 0.99                         |
| Mass from Porod invariant <sup>7</sup>                           | 100,900                     | 99,497                       | 103,410                      |
| <u>Real-space Analysis</u>                                       |                             |                              |                              |
| I(0)                                                             | 45.85 (0.99)                | 45.53 (0.82)                 | 44.84 (1.05)                 |
| R <sub>g</sub> (Å)                                               | 44.70 (2.00)                | 45.47 (1.62)                 | 42.77 (2.43)                 |
| D <sub>max</sub> (Å)                                             | 181                         | 187                          | 175                          |
| q range (Å <sup>-1</sup> )                                       | 0.0137 - 0.2338             | 0.0137 - 0.2338              | 0.0137 - 0.2338              |
| χ <sup>2</sup>                                                   | 0.21                        | 0.24                         | 0.92                         |
| Porod volume, V <sub>p</sub> (Å <sup>3</sup> )                   | 314,858                     | 304,031                      | 309,876                      |
| Porod coefficient, P <sub>x</sub>                                | 2.70 (0.03)                 | 2.84 (0.03)                  | 2.71 (0.05)                  |
| <b>Structural Parameters</b>                                     | <b>AIF-W196A (0.3 s)</b>    | <b>AIF-W196A (2.1 s)</b>     | <b>AIF-W196A (3.0 s)</b>     |
| <u>Guinier Analysis</u>                                          |                             |                              |                              |
| I(0)                                                             | 24.76 (0.22)                | 30.03 (0.31)                 | 31.18 (0.35)                 |
| R <sub>g</sub> (Å)                                               | 33.40 (0.40)                | 37.35 (0.49)                 | 38.13 (0.54)                 |
| q <sub>min</sub> (Å <sup>-1</sup> )                              | 0.0101                      | 0.0101                       | 0.1010                       |
| qR <sub>g</sub> max (q <sub>min</sub> = 0.0101 Å <sup>-1</sup> ) | 1.30                        | 1.30                         | 1.29                         |
| Coefficient of correlation, R <sup>2</sup>                       | 1.00                        | 1.00                         | 1.00                         |
| Mass from Porod invariant <sup>7</sup>                           | 71,332                      | 90,153                       | 95,054                       |
| <u>Real-space Analysis</u>                                       |                             |                              |                              |
| I(0)                                                             | 24.41 (0.87)                | 29.18 (0.58)                 | 31.53 (0.71)                 |
| R <sub>g</sub> (Å)                                               | 34.15 (0.95)                | 37.41 (0.85)                 | 39.20 (1.18)                 |
| D <sub>max</sub> (Å)                                             | 124                         | 138                          | 140                          |
| q range (Å <sup>-1</sup> )                                       | 0.0101 - 0.2142             | 0.0101 - 0.2142              | 0.0101 - 0.2142              |
| χ <sup>2</sup>                                                   | 0.16                        | 0.56                         | 0.31                         |
| Porod volume, V <sub>p</sub> (Å <sup>3</sup> )                   | 143,938                     | 178,046                      | 216,953                      |
| Porod coefficient, P <sub>x</sub>                                | 3.94 (0.11)                 | 3.99 (0.08)                  | 3.23 (0.03)                  |

**Supplementary Table 4. Wild-type and W196A AIF affinities for mitochondrial partner CHCHD4 stimulated by native NADH or CX1 chemotype ligands.** Standard errors of fitting are included in parentheses. Binding constants for wild-type AIF with the CX1 chemotype are approximate as saturation was not reached.

|             | Dissociation Constants for<br>CHCHD4 ( $\mu\text{M}$ ) |             |
|-------------|--------------------------------------------------------|-------------|
|             | AIF-WT                                                 | AIF-W196A   |
| <b>DMSO</b> | ND                                                     | 4.29 (0.30) |
| <b>NADH</b> | 0.47 (0.02)                                            | 0.70 (0.04) |
| <b>C12</b>  | 46 (12)                                                | 1.54 (0.07) |
| <b>D1</b>   | 13 (1.2)                                               | 0.99 (0.11) |
| <b>D3</b>   | 12 (1.1)                                               | 0.99 (0.06) |

**Supplementary Table 5. AIF-GL2500 Summary of Crystallographic Structures.**

| Target           | Chemotype | Ligand | Resolution ( $\text{\AA}$ ) | $R_{\text{work}}/R_{\text{free}}$ (%) | Refined Ligand Occupancy |            |
|------------------|-----------|--------|-----------------------------|---------------------------------------|--------------------------|------------|
|                  |           |        |                             |                                       | Monomer A                | Monomer B  |
| <b>AIF-W196A</b> | 1         | C12    | 2.38                        | 18.0 / 21.2                           | 100%                     | Unmodelled |
|                  | 1         | D1     | 2.58                        | 19.4 / 24.2                           | 88%                      | 77%        |
|                  | 1         | D3     | 2.51                        | 20.4 / 23.1                           | 100%                     | 100%       |
|                  | 1         | 4AQ    | 2.65                        | 21.3 / 24.4                           | 100%                     | 100%       |
| <b>AIF-WT</b>    | 1         | D3     | 2.25                        | 20.7 / 23.7                           | 74%                      | 77%        |
|                  | 2         | C9     | 2.40                        | 19.7 / 21.4                           | 100%                     | 100%       |
|                  | 2         | C11    | 2.30                        | 18.9 / 22.0                           | 80%                      | 100%       |
|                  | 2         | D7     | 2.25                        | 21.3 / 23.7                           | 76%                      | 76%        |

**Supplementary Table 6. X-ray data collection and refinement statistics for AIF-W196A-GL2500 complexes**

|                                                     | AIF-W196A-C12                                 | AIF-W196A-D1                                  | AIF-W196A-D3                                  | AIF-W196A-4AQ                                 |
|-----------------------------------------------------|-----------------------------------------------|-----------------------------------------------|-----------------------------------------------|-----------------------------------------------|
| <b>Data collection</b>                              |                                               |                                               |                                               |                                               |
| Space group                                         | P2 <sub>1</sub> 2 <sub>1</sub> 2 <sub>1</sub> | P2 <sub>1</sub> 2 <sub>1</sub> 2 <sub>1</sub> | P2 <sub>1</sub> 2 <sub>1</sub> 2 <sub>1</sub> | P2 <sub>1</sub> 2 <sub>1</sub> 2 <sub>1</sub> |
| Cell dimensions                                     |                                               |                                               |                                               |                                               |
| <i>a</i> , <i>b</i> , <i>c</i> (Å)                  | 90.79, 114.33, 120.07                         | 88.3, 110.97, 114.77                          | 90.79, 114.77, 120.91                         | 91.06, 114.97, 122.03                         |
| $\alpha$ , $\beta$ , $\gamma$ (°)                   | 90, 90, 90                                    | 90, 90, 90                                    | 90, 90, 90                                    | 90, 90, 90                                    |
| Resolution (Å)                                      | 29.25-2.39 (2.47-2.39)                        | 29.33-2.58 (2.67-2.58)                        | 29.36-2.51 (2.6-2.51)                         | 29.49-2.65 (2.75- 2.65)                       |
| <i>R</i> <sub>merge</sub>                           | 0.102 (0.712)                                 | 0.105 (0.77)                                  | 0.0839 (0.731)                                | 0.128 (0.905)                                 |
| <i>I</i> / $\sigma$ <i>I</i>                        | 16.1 (3.3)                                    | 14.4 (2.9)                                    | 18.7 (3.0)                                    | 15.4 (2.5)                                    |
| Completeness (%)                                    | 99.3 (93.4)                                   | 99.7 (98.9)                                   | 99.5 (96.7)                                   | 99.9 (100.0)                                  |
| Redundancy                                          | 10.7 (10.5)                                   | 9.9 (9.8)                                     | 10.4 (10.5)                                   | 11.0 (11.1)                                   |
| <b>Refinement</b>                                   |                                               |                                               |                                               |                                               |
| Resolution (Å)                                      | 2.39                                          | 2.58                                          | 2.51                                          | 2.65                                          |
| No. reflections                                     | 50130 (4649)                                  | 36094 (3543)                                  | 43661 (4182)                                  | 37870 (3728)                                  |
| <i>R</i> <sub>work</sub> / <i>R</i> <sub>free</sub> | 18.0% / 21.2%                                 | 19.4% / 24.2%                                 | 20.4% / 23.1%                                 | 21.3% / 24.3%                                 |
| No. atoms                                           | 7006                                          | 6666                                          | 6802                                          | 6627                                          |
| Protein                                             | 6523                                          | 6425                                          | 6488                                          | 6428                                          |
| Ligand/ion                                          | 127                                           | 134                                           | 134                                           | 147                                           |
| Water                                               | 356                                           | 107                                           | 180                                           | 52                                            |
| <i>B</i> -factors                                   | 47.46                                         | 59.98                                         | 62.67                                         | 55.34                                         |
| Protein                                             | 47.71                                         | 60.35                                         | 63.02                                         | 55.55                                         |
| Ligand/ion                                          | 36.85                                         | 49.35                                         | 56.77                                         | 49.43                                         |
| Water                                               | 46.55                                         | 50.6                                          | 54.57                                         | 46.13                                         |
| R.m.s. deviations                                   |                                               |                                               |                                               |                                               |
| Bond lengths (Å)                                    | 0.004                                         | 0.005                                         | 0.004                                         | 0.004                                         |
| Bond angles (°)                                     | 0.59                                          | 0.62                                          | 0.59                                          | 0.59                                          |

\*Values in parentheses are for highest-resolution shell.

**Supplementary Table 7. X-ray data collection and refinement statistics for AIF-WT-GL2500 complexes**

|                                                     | AIF-WT-D3                                     | AIF-WT-C9                                     | AIF-WT-C11                                    | AIF-WT-D7                                     |
|-----------------------------------------------------|-----------------------------------------------|-----------------------------------------------|-----------------------------------------------|-----------------------------------------------|
| <b>Data collection</b>                              |                                               |                                               |                                               |                                               |
| Space group                                         | P2 <sub>1</sub> 2 <sub>1</sub> 2 <sub>1</sub> | P2 <sub>1</sub> 2 <sub>1</sub> 2 <sub>1</sub> | P2 <sub>1</sub> 2 <sub>1</sub> 2 <sub>1</sub> | P2 <sub>1</sub> 2 <sub>1</sub> 2 <sub>1</sub> |
| Cell dimensions                                     |                                               |                                               |                                               |                                               |
| <i>a</i> , <i>b</i> , <i>c</i> (Å)                  | 91.32, 115.22, 122.48                         | 91.47, 115.32, 123.97                         | 91.39, 115.02, 124.12                         | 91.10, 115.05, 122.17                         |
| $\alpha$ , $\beta$ , $\gamma$ (°)                   | 90, 90, 90                                    | 90, 90, 90                                    | 90, 90, 90                                    | 90, 90, 90                                    |
| Resolution (Å)                                      | 73.21-2.25 (2.33-2.25)                        | 84.44-2.4 (2.49-2.4)                          | 57.51-2.3 (2.38-2.3)                          | 73.03-2.25 (2.33-2.25)                        |
| <i>R</i> <sub>merge</sub>                           | 0.118 (1.26)                                  | 0.0887 (0.712)                                | 0.0756 (0.656)                                | 0.0750 (0.874)                                |
| <i>I</i> / $\sigma$ <i>I</i>                        | 12.89 (1.69)                                  | 19.85 (3.25)                                  | 21.63 (3.58)                                  | 17.75 (2.20)                                  |
| Completeness (%)                                    | 99.9 (99.9)                                   | 99.8 (99.8)                                   | 99.9 (99.8)                                   | 99.5 (99.0)                                   |
| Redundancy                                          | 8.9 (9.1)                                     | 10.4 (9.8)                                    | 13.2 (13.4)                                   | 11.2 (10.9)                                   |
| <b>Refinement</b>                                   |                                               |                                               |                                               |                                               |
| Resolution (Å)                                      | 2.25                                          | 2.4                                           | 2.3                                           | 2.25                                          |
| No. reflections                                     | 61911 (6074)                                  | 51865 (5113)                                  | 58686 (5762)                                  | 61308 (6011)                                  |
| <i>R</i> <sub>work</sub> / <i>R</i> <sub>free</sub> | 20.7% / 23.5%                                 | 19.9% / 21.4%                                 | 19.0% / 22.0%                                 | 21.3% / 23.7%                                 |
| No. atoms                                           | 6977                                          | 6820                                          | 6960                                          | 6828                                          |
| Protein                                             | 6526                                          | 6487                                          | 6554                                          | 6508                                          |
| Ligand/ion                                          | 168                                           | 161                                           | 161                                           | 176                                           |
| Water                                               | 283                                           | 172                                           | 245                                           | 144                                           |
| <i>B</i> -factors                                   | 53.75                                         | 54.44                                         | 53.71                                         | 64.61                                         |
| Protein                                             | 54.02                                         | 54.76                                         | 54.04                                         | 64.99                                         |
| Ligand/ion                                          | 48.28                                         | 48.18                                         | 47.01                                         | 58.8                                          |
| Water                                               | 50.67                                         | 48.15                                         | 49.43                                         | 54.42                                         |
| R.m.s. deviations                                   |                                               |                                               |                                               |                                               |
| Bond lengths (Å)                                    | 0.005                                         | 0.004                                         | 0.005                                         | 0.004                                         |
| Bond angles (°)                                     | 0.64                                          | 0.59                                          | 0.66                                          | 0.55                                          |

\*Values in parentheses are for highest-resolution shell.

## Supplementary References

- 1 Brosey, C. A. *et al.* Defining NADH-Driven Allostery Regulating Apoptosis-Inducing Factor. *Structure* **24**, 2067-2079, doi:10.1016/j.str.2016.09.012 (2016).
- 2 Churbanova, I. Y. & Sevrioukova, I. F. Redox-dependent changes in molecular properties of mitochondrial apoptosis-inducing factor. *J Biol Chem* **283**, 5622-5631, doi:10.1074/jbc.M709147200 (2008).
- 3 Classen, S. *et al.* Implementation and performance of SIBYLS: a dual endstation small-angle X-ray scattering and macromolecular crystallography beamline at the Advanced Light Source. *Journal of Applied Crystallography* **46**, 1-13, doi:10.1107/S0021889812048698 (2013).
- 4 Gasteiger, E. *et al.* in *The Proteomics Protocols Handbook* (ed John M. Walker) 571-607 (Humana Press, 2005).
- 5 Whitten, A. E., Cai, S. & Trewthella, J. MULCh: modules for the analysis of small-angle neutron contrast variation data from biomolecular assemblies. *Journal of Applied Crystallography* **41**, 222-226, doi:doi:10.1107/S0021889807055136 (2008).
- 6 Franke, D. *et al.* ATSAS 2.8: a comprehensive data analysis suite for small-angle scattering from macromolecular solutions. *J Appl Crystallogr* **50**, 1212-1225, doi:10.1107/S1600576717007786 (2017).
- 7 Rambo, R. P. & Tainer, J. A. Accurate assessment of mass, models and resolution by small-angle scattering. *Nature* **496**, 477-481, doi:10.1038/nature12070 (2013).
